# Supplementary material for: An Updated Review on Marine Anticancer Compounds: The Use of Virtual Screening for the Discovery of Small-Molecule Cancer Drugs
Source: PubMed Central journal article supplement (PMC6152364; doi:10.3390/molecules22071037), 2017-06-23
Supplement: molecules-22-01037-s001.pdf [file molecules-22-01037-s001.pdf]

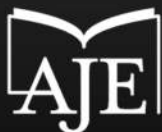

# EDITORIAL CERTIFICATE

This document certifies that the manuscript listed below was edited for proper English language, grammar, punctuation, spelling, and overall style by one or more of the highly qualified native English speaking editors at American Journal Experts.

## Manuscript title:

An updated review on marine anticancer compounds: the use of virtual screening for the discovery of small molecule cancer drugs

## Authors:

Verónica Ruiz-Torres, Jose Antonio Encinar, Maria Herranz-López, Vicente Galiano, Enrique Barraji3n-Catal3n and Vicente Micol

## Date Issued:

May 15, 2017

## Certificate Verification Key:

BADF-B3AE-81F0-33F3-D9B1

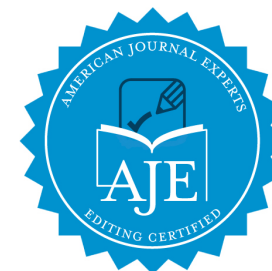

This certificate may be verified at [www.aje.com/certificate](http://www.aje.com/certificate). This document certifies that the manuscript listed above was edited for proper English language, grammar, punctuation, spelling, and overall style by one or more of the highly qualified native English speaking editors at American Journal Experts. Neither the research content nor the authors' intentions were altered in any way during the editing process. Documents receiving this certification should be English-ready for publication; however, the author has the ability to accept or reject our suggestions and changes. To verify the final AJE edited version, please visit our verification page. If you have any questions or concerns about this edited document, please contact American Journal Experts at [support@aje.com](mailto:support@aje.com).
